# Supplementary material for: Copper-catalyzed distannylation of alkynes
Source: Royal Society of Chemistry journal article supplement (doi:10.1039/c3cc47173j), 2013-01-01

*Supplementary Information for*

**Copper-catalyzed distannylation of alkynes**

*Hiroto Yoshida,\* Ayako Shinke and Ken Takaki*

Department of Applied Chemistry, Graduate School of Engineering, Hiroshima University,  
Higashi-Hiroshima 739-8527, Japan

**Contents**

|                                                                      |            |
|----------------------------------------------------------------------|------------|
| <b>General remarks</b>                                               | <b>S2</b>  |
| <b>Experimental procedures and characterization data of products</b> | <b>S3</b>  |
| <b>References</b>                                                    | <b>S9</b>  |
| <b><sup>1</sup>H and <sup>13</sup>C NMR spectra of new compounds</b> | <b>S10</b> |

### General remarks.

All manipulations of oxygen- and moisture-sensitive materials were conducted with a standard Schlenk technique under a purified argon atmosphere. Nuclear magnetic resonance spectra were taken on a Varian 400-MR ( $^1\text{H}$ , 400 MHz;  $^{13}\text{C}$ , 100 MHz) spectrometer or a Varian System 500 ( $^1\text{H}$ , 500 MHz;  $^{13}\text{C}$ , 125 MHz;  $^{119}\text{Sn}$ , 186 MHz) spectrometer using residual chloroform ( $^1\text{H}$ ,  $\delta = 7.26$ ) or  $\text{CDCl}_3$  ( $^{13}\text{C}$ ,  $\delta = 77.0$ ) as an internal standard, and tetramethyltin ( $^{119}\text{Sn}$ ,  $\delta = 0$ ) as an external standard.  $^1\text{H}$  NMR data are reported as follows: chemical shift, multiplicity (s = singlet, d = doublet, t = triplet, q = quartet, m = multiplet, br = broad), coupling constants (Hz), integration. High-resolution mass spectra (ESI or APCI/FTMS) were obtained with Thermo Fisher Scientific LTQ Orbitrap XL spectrometer. Preparative recycling gel permeation chromatography was performed with JAI LC-908 or JAI LC-9201 equipped with JAI GEL-1H and -2H columns (chloroform or toluene as an eluent). Column chromatography was carried out using Merck Aluminium oxide 90 (activity IV). Hexamethyldistannane (**2**)<sup>1</sup> and tris(triphenylphosphine)copper acetate<sup>2</sup> were synthesized according to literature procedures. Alkynes were purified prior to use by distillation. DMF was distilled from calcium hydride and stored over activated molecular sieves 4A.

### Cu-catalyzed distannylation of alkynes: a general procedure.

A Schlenk tube equipped with a magnetic stirring bar was charged with  $\text{Cs}_2\text{CO}_3$  (0.060 mmol) before flame-drying under vacuum. To this were added  $\text{Cu}(\text{OAc})(\text{PPh}_3)_3$  (6.0  $\mu\text{mol}$ ) and DMF (0.2 mL), and the resulting mixture was stirred at room temperature for 1 h. Then tetramethyldistannane (0.30 mmol) and an alkyne (0.45 mmol) were added, and the resulting mixture was stirred at 60 °C for the period as specified in Table 2. The mixture was diluted with ethyl acetate and filtered through a Celite plug. The organic solution was washed twice with water and dried over  $\text{MgSO}_4$ . Evaporation of the solvent followed by preparative recycling gel permeation chromatography (chloroform or toluene as an eluent) or alumina-column chromatography (hexane as an eluent) gave the corresponding product.

#### (Z)-Oct-1-ene-1,2-diylbis(trimethylstannane) (3a)

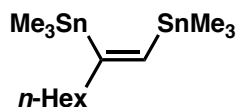

Isolated in 80% yield as a colorless oil:  $^1\text{H}$  NMR ( $\text{CDCl}_3$ )  $\delta$  0.16 (s,  $^2J_{\text{Sn-H}} = 53.0$  Hz, 9H), 0.17 (s,  $^2J_{\text{Sn-H}} = 51.5$  Hz, 9H), 0.89 (t,  $J = 5.3$  Hz, 3H), 1.27 (m, 4H), 2.33 (t,  $^3J_{\text{Sn-H}} = 52.0$  Hz,  $J = 7.5$  Hz, 2H), 6.61 (s,  $^3J_{^{119}\text{Sn-H}} = 203.4$  Hz,  $^3J_{^{117}\text{Sn-H}} = 194.3$  Hz,  $^2J_{\text{Sn-H}} = 88.9$  Hz, 1H);  $^{13}\text{C}$  NMR ( $\text{CDCl}_3$ )  $\delta$  -7.71, -7.47, 14.09, 22.62, 28.88, 29.88, 31.72, 47.67, 142.47, 169.16;  $^{119}\text{Sn}$  NMR ( $\text{CDCl}_3$ )  $\delta$  -63.48, -50.93; HRMS Calcd for  $\text{C}_{13}\text{H}_{29}\text{Sn}_2$ :  $[\text{M-Me}]^-$ , 425.03077. Found:  $m/z$  425.03107.

#### (Z)-Hex-1-ene-1,2-diylbis(trimethylstannane) (3b)

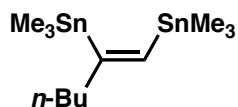

Isolated in 80% yield as a colorless oil:  $^1\text{H}$  NMR ( $\text{CDCl}_3$ )  $\delta$  0.16 (s,  $^2J_{\text{Sn-H}} = 52.8$  Hz, 9H), 0.17 (s,  $^2J_{\text{Sn-H}} = 51.5$  Hz, 9H), 0.90 (t,  $J = 7.2$  Hz, 3H), 1.32 (m, 4H), 2.34 (t,  $^3J_{\text{Sn-H}} = 50.6$  Hz,  $J = 6.4$  Hz, 2H), 6.61 (s,  $^3J_{^{119}\text{Sn-H}} = 202.7$  Hz,  $^3J_{^{117}\text{Sn-H}} = 193.7$  Hz,  $^2J_{\text{Sn-H}} = 88.2$  Hz, 1H);  $^{13}\text{C}$  NMR ( $\text{CDCl}_3$ )  $\delta$  -7.69, -7.47, 14.00, 22.27, 32.10, 47.35, 142.51, 169.21;  $^{119}\text{Sn}$  NMR ( $\text{CDCl}_3$ )  $\delta$  -63.55, -50.90; HRMS Calcd for  $\text{C}_{11}\text{H}_{25}\text{Sn}_2$ :  $[\text{M-Me}]^-$ , 396.99947. Found:  $m/z$  397.00031.

#### (Z)-Dec-1-ene-1,2-diylbis(trimethylstannane) (3c)

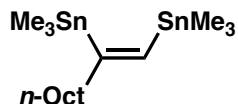

Isolated in 90% yield as a colorless oil:  $^1\text{H}$  NMR ( $\text{CDCl}_3$ )  $\delta$  0.16 (s,  $^2J_{\text{Sn-H}} = 53.4$  Hz, 9H), 0.18 (s,  $^2J_{\text{Sn-H}} = 52.3$  Hz, 9H), 0.89 (t,  $J = 7.0$  Hz, 3H), 1.23–1.37 (m, 8H), 2.33 (t,  $^3J_{\text{Sn-H}} = 51.1$  Hz,  $J = 6.7$  Hz, 2H), 6.61 (s,  $^3J_{\text{H}^{119}\text{Sn-H}} = 203.1$  Hz,  $^3J_{\text{H}^{117}\text{Sn-H}} = 194.2$  Hz,  $^2J_{\text{Sn-H}} = 89.6$  Hz, 1H);  $^{13}\text{C}$  NMR ( $\text{CDCl}_3$ )  $\delta$  -7.70, -7.47, 14.12, 22.67, 29.19, 29.27, 31.87, 29.91, 29.44, 47.66, 142.46, 169.27;  $^{119}\text{Sn}$  NMR ( $\text{CDCl}_3$ )  $\delta$  -63.50, -50.93; HRMS Calcd for  $\text{C}_{15}\text{H}_{33}\text{Sn}_2$ :  $[\text{M-Me}]^-$ , 453.06207. Found:  $m/z$  453.06271.

**(Z)-(5-Methylhex-1-ene-1,2-diyl)bis(trimethylstannane) (3d)**

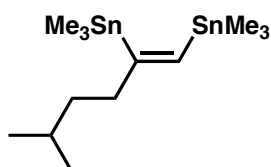

Isolated in 85% yield as a colorless oil:  $^1\text{H}$  NMR ( $\text{CDCl}_3$ )  $\delta$  0.16 (s,  $^2J_{\text{H}^{119}\text{Sn-H}} = 53.8$  Hz,  $^2J_{\text{H}^{117}\text{Sn-H}} = 51.7$  Hz, 9H), 0.17 (s,  $J_{\text{H}^{119}\text{Sn-H}} = 52.5$  Hz,  $^3J_{\text{H}^{117}\text{Sn-H}} = 50.3$  Hz, 9H), 0.88 (d,  $J = 6.7$  Hz, 6H), 1.22 (q,  $J = 6.7$  Hz, 2H), 1.53 (nonet,  $J = 6.7$  Hz, 1H), 2.25–2.40 (m, 2H), 6.62 (t,  $^3J_{\text{H}^{119}\text{Sn-H}} = 202.7$  Hz,  $^3J_{\text{H}^{117}\text{Sn-H}} = 193.6$  Hz,  $^2J_{\text{H}^{119}\text{Sn-H}} = 89.8$  Hz,  $^2J_{\text{H}^{117}\text{Sn-H}} = 86.1$  Hz,  $J = 1.2$  Hz);  $^{13}\text{C}$  NMR ( $\text{CDCl}_3$ )  $\delta$  -7.70, -7.41, 22.60, 27.75, 39.33, 45.58, 142.37, 169.39;  $^{119}\text{Sn}$  NMR ( $\text{CDCl}_3$ )  $\delta$  -63.41, -50.60; HRMS Calcd for  $\text{C}_{12}\text{H}_{27}\text{Sn}_2$ :  $[\text{M-Me}]^-$ , 411.01512. Found:  $m/z$  411.01593.

**(Z)-(4-Methylpent-1-ene-1,2-diyl)bis(trimethylstannane) (3e)**

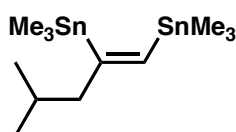

Isolated in 62% yield as a colorless oil:  $^1\text{H}$  NMR ( $\text{CDCl}_3$ )  $\delta$  0.14 (s,  $^2J_{\text{Sn-H}} = 52.9$  Hz, 9H), 0.14 (s,  $^2J_{\text{Sn-H}} = 51.5$  Hz, 9H), 0.13 (d,  $J = 6.6$  Hz, 6H), 1.55 (nonet,  $J = 6.6$  Hz, 2H), 2.19 (dd,  $^3J_{\text{Sn-H}} = 53.9$  Hz,  $J = 7.4, 1.2$  Hz, 2H), 6.52 (t,  $^3J_{\text{H}^{119}\text{Sn-H}} = 203.4$  Hz,  $^3J_{\text{H}^{117}\text{Sn-H}} = 194.4$  Hz,  $^2J_{\text{H}^{119}\text{Sn-H}} = 91.1$  Hz,  $^2J_{\text{H}^{117}\text{Sn-H}} = 87.3$  Hz,  $J = 1.2$  Hz, 1H);  $^{13}\text{C}$  NMR ( $\text{CDCl}_3$ )  $\delta$  -7.70, -7.43, 22.19, 27.69, 57.52, 143.90, 168.37;  $^{119}\text{Sn}$  NMR ( $\text{CDCl}_3$ )  $\delta$  -64.50, -50.93; HRMS Calcd for  $\text{C}_{11}\text{H}_{25}\text{Sn}_2$ :  $[\text{M-Me}]^-$ , 396.99947. Found:  $m/z$  397.00095.

**(Z)-(1-Cyclopentylethene-1,2-diyl)bis(trimethylstannane) (3f)**

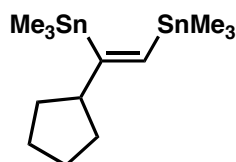

Isolated in 78% yield as a colorless oil:  $^1\text{H}$  NMR ( $\text{CDCl}_3$ )  $\delta$  0.16 (s,  $^2J_{\text{Sn-H}}^{119} = 53.8$  Hz,  $^2J_{\text{Sn-H}}^{117} = 51.5$  Hz, 9H), 0.18 (s,  $^2J_{\text{Sn-H}}^{119} = 52.1$  Hz,  $^2J_{\text{Sn-H}}^{117} = 50.0$  Hz, 9H), 1.33–1.78 (m, 8H), 2.57–2.73 (m, 1H), 6.63 (d,  $^3J_{\text{Sn-H}}^{119} = 210.0$  Hz,  $^3J_{\text{Sn-H}}^{117} = 200.1$  Hz,  $^2J_{\text{Sn-H}} = 88.2$  Hz,  $J = 1.3$  Hz, 1H);  $^{13}\text{C}$  NMR ( $\text{CDCl}_3$ )  $\delta$  -7.38, -6.66, 32.13, 24.88, 55.93, 138.80, 172.21;  $^{119}\text{Sn}$  NMR ( $\text{CDCl}_3$ )  $\delta$  -61.72, -53.93; HRMS Calcd for  $\text{C}_{12}\text{H}_{25}\text{Sn}_2$ :  $[\text{M-Me}]^-$ , 408.99947. Found:  $m/z$  408.99896.

**(Z)-(3,3-Dimethylbut-1-ene-1,2-diyl)bis(trimethylstannane) (3g)**

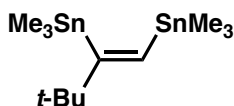

Isolated in 10% yield as a colorless oil:  $^1\text{H}$  NMR ( $\text{CDCl}_3$ )  $\delta$  0.17 (s,  $^2J_{\text{Sn-H}} = 52.8$  Hz, 9H), 0.21 (s,  $^2J_{\text{Sn-H}} = 50.3$  Hz, 9H), 1.06 (s, 9H), 6.56 (s,  $^3J_{\text{Sn-H}}^{119} = 218.7$  Hz,  $^3J_{\text{Sn-H}}^{117} = 209.0$  Hz,  $^2J_{\text{Sn-H}} = 69.6$  Hz, 1H);  $^{13}\text{C}$  NMR ( $\text{CDCl}_3$ )  $\delta$  -6.87, -4.59, 30.02, 135.85, 178.85;  $^{119}\text{Sn}$  NMR ( $\text{CDCl}_3$ )  $\delta$  -60.50, -57.91; HRMS Calcd for  $\text{C}_{11}\text{H}_{25}\text{Sn}_2$ :  $[\text{M-Me}]^-$ , 396.99947. Found:  $m/z$  396.99942.

**(Z)-(5-Chloropent-1-ene-1,2-diyl)bis(trimethylstannane) (3h)**

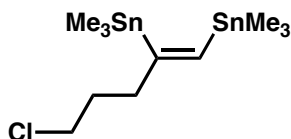

Isolated in 76% yield as a yellow oil:  $^1\text{H}$  NMR ( $\text{CDCl}_3$ )  $\delta$  0.16 (s,  $^2J_{\text{Sn-H}}^{119} = 54.3$  Hz,  $^2J_{\text{Sn-H}}^{117} = 51.6$  Hz, 9H), 0.18 (s,  $^2J_{\text{Sn-H}}^{119} = 53.0$  Hz,  $^2J_{\text{Sn-H}}^{117} = 50.1$  Hz, 9H), 1.82 (quint,  $J = 6.6$  Hz, 2H), 2.48 (t,  $^3J_{\text{Sn-H}} = 48.2$  Hz,  $J = 7.7$  Hz, 2H), 3.50 (t,  $J = 7.0$  Hz, 2H), 6.67 (s,  $^3J_{\text{Sn-H}}^{119} = 195.4$  Hz,  $^3J_{\text{Sn-H}}^{117} = 189.6$  Hz,  $^2J_{\text{Sn-H}} = 84.5$  Hz, 1H);  $^{13}\text{C}$  NMR ( $\text{CDCl}_3$ )  $\delta$  -7.70, -7.50, 32.45, 44.15, 44.36, 144.75, 166.61;  $^{119}\text{Sn}$  NMR ( $\text{CDCl}_3$ )  $\delta$  -62.44, -49.22; HRMS Calcd for  $\text{C}_{10}\text{H}_{22}\text{ClSn}_2$ :  $[\text{M-Me}]^-$ , 416.94485. Found:  $m/z$  416.94467.

**(Z)-5,6-Bis(trimethylstannyl)hex-5-enenitrile (3i)**

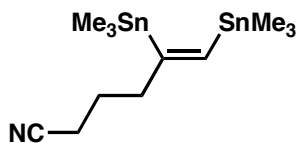

Isolated in 51% yield as a brown oil:  $^1\text{H}$  NMR ( $\text{CDCl}_3$ )  $\delta$  0.17 (s,  $^2J_{\text{Sn-H}}^{119} = 54.0$  Hz,  $^2J_{\text{Sn-H}}^{117} = 52.1$  Hz, 9H), 0.19 (s,  $^2J_{\text{Sn-H}}^{119} = 52.9$  Hz,  $^2J_{\text{Sn-H}}^{117} = 50.5$  Hz, 9H), 1.72 (quint,  $J = 7.4$  Hz, 2H), 2.30 (t,  $J = 7.4$  Hz, 2H), 2.38–2.55 (m, 2H), 6.69 (s,  $^3J_{\text{Sn-H}}^{119} = 194.1$  Hz,  $^3J_{\text{Sn-H}}^{117} = 185.8$  Hz,  $^2J_{\text{Sn-H}}^{119} = 83.3$  Hz,  $^2J_{\text{Sn-H}}^{117} = 80.8$  Hz, 1H);  $^{13}\text{C}$  NMR ( $\text{CDCl}_3$ )  $\delta$  -7.69, -7.50,

16.29, 25.00, 45.69, 119.67, 146.03, 165.67;  $^{119}\text{Sn}$  NMR ( $\text{CDCl}_3$ )  $\delta$  -61.85, -48.64; HRMS Calcd for  $\text{C}_{11}\text{H}_{22}\text{NSn}_2$ :  $[\text{M-Me}]^-$ , 407.97907. Found:  $m/z$  407.98001.

**(Z)-N,N-Dimethyl-2,3-bis(trimethylstannyl)prop-2-en-1-amine (3j)**

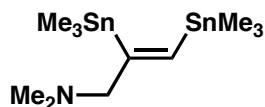

Isolated in 54% yield as a colorless oil:  $^1\text{H}$  NMR ( $\text{CDCl}_3$ )  $\delta$  0.13 (s,  $^2J_{\text{Sn-H}}^{119} = 53.5$  Hz,  $^2J_{\text{Sn-H}}^{117} = 51.6$  Hz, 9H), 0.17 (s,  $^2J_{\text{Sn-H}}^{119} = 54.1$  Hz,  $^2J_{\text{Sn-H}}^{117} = 52.1$  Hz, 9H), 2.12 (s, 6H), 3.01 (d,  $^3J_{\text{Sn-H}} = 48.1$  Hz,  $J = 1.4$  Hz, 2H), 6.73 (t,  $^3J_{\text{Sn-H}}^{119} = 201.3$  Hz,  $^3J_{\text{Sn-H}}^{117} = 192.4$  Hz,  $^2J_{\text{Sn-H}}^{119} = 90.5$  Hz,  $^2J_{\text{Sn-H}}^{117} = 87.1$  Hz,  $J = 1.4$  Hz, 1H);  $^{13}\text{C}$  NMR ( $\text{CDCl}_3$ )  $\delta$  -7.71, -7.23, 45.03, 75.52, 142.83, 169.79;  $^{119}\text{Sn}$  NMR ( $\text{CDCl}_3$ )  $\delta$  -62.24, -54.24; HRMS Calcd for  $\text{C}_{10}\text{H}_{24}\text{NSn}_2$ :  $[\text{M-Me}]^-$ , 397.99472. Found:  $m/z$  397.99518.

**(Z)-N,N-Diethyl-2,3-bis(trimethylstannyl)prop-2-en-1-amine (3k)**

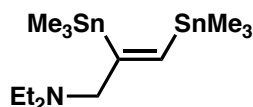

Isolated in 54% yield as a colorless oil:  $^1\text{H}$  NMR ( $\text{CDCl}_3$ )  $\delta$  0.18 (s,  $^2J_{\text{Sn-H}} = 53.2$  Hz, 18H), 3.29 (s, 3H), 4.02 (s,  $^3J_{\text{Sn-H}} = 39.3$  Hz, 2H), 6.89 (s,  $^3J_{\text{Sn-H}}^{119} = 190.3$  Hz,  $^3J_{\text{Sn-H}}^{117} = 183.1$  Hz,  $^2J_{\text{Sn-H}} = 84.1$  Hz, 1H);  $^{13}\text{C}$  NMR ( $\text{CDCl}_3$ )  $\delta$  -7.61, -7.13, 10.50, 44.92, 70.14, 142.75, 169.83;  $^{119}\text{Sn}$  NMR ( $\text{CDCl}_3$ )  $\delta$  -63.05, -55.94; HRMS Calcd for  $\text{C}_{12}\text{H}_{28}\text{NSn}_2$ :  $[\text{M-Me}]^-$ , 426.02602. Found:  $m/z$  426.02637.

**(Z)-(3-Methoxyprop-1-ene-1,2-diyl)bis(trimethylstannane) (3l)**

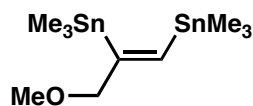

Isolated in 41% yield as a colorless oil:  $^1\text{H}$  NMR ( $\text{CDCl}_3$ )  $\delta$  0.17 (s,  $^2J_{\text{Sn-H}} = 52.8$  Hz, 9H), 0.21 (s,  $^2J_{\text{Sn-H}} = 50.3$  Hz, 9H), 1.06 (s, 9H), 6.56 (s,  $^3J_{\text{Sn-H}}^{119} = 218.7$  Hz,  $^3J_{\text{Sn-H}}^{117} = 209.0$  Hz,  $^2J_{\text{Sn-H}} = 69.6$  Hz, 1H);  $^{13}\text{C}$  NMR ( $\text{CDCl}_3$ )  $\delta$  -7.78, -7.68, 57.66, 84.37, 144.71, 165.17;  $^{119}\text{Sn}$  NMR ( $\text{CDCl}_3$ )  $\delta$  -59.42, -48.53;  $^{119}\text{Sn}$  NMR ( $\text{CDCl}_3$ )  $\delta$  -62.24, -54.24; HRMS Calcd for  $\text{C}_9\text{H}_{21}\text{OSn}_2$ :  $[\text{M-Me}]^-$ , 384.96309. Found:  $m/z$  384.96249.

**(Z)-(1-Phenylethene-1,2-diyl)bis(trimethylstannane) (3m)**

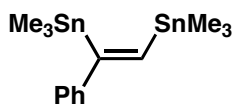

Isolated in 64% yield as a yellow oil:  $^1\text{H}$  NMR ( $\text{CDCl}_3$ )  $\delta$  0.19 (s,  $^2J_{\text{Sn-H}}^{119} = 53.4$  Hz,  $^2J_{\text{Sn-H}}^{117} = 51.1$  Hz, 9H), 0.24 (s,  $^2J_{\text{Sn-H}}^{119} = 54.5$  Hz,  $^2J_{\text{Sn-H}}^{117} = 52.0$  Hz, 9H), 6.95 (s,  $^3J_{\text{Sn-H}}^{119} = 188.1$  Hz,  $^3J_{\text{Sn-H}}^{117} = 179.9$  Hz,  $^2J_{\text{Sn-H}}^{119} = 82.7$  Hz,  $^2J_{\text{Sn-H}}^{117} = 79.0$  Hz, 1H), 7.02–7.03 (m, 2H), 7.13–7.18 (m, 1H), 7.24–7.30 (m, 2H);  $^{13}\text{C}$  NMR ( $\text{CDCl}_3$ )  $\delta$  -7.47, -6.70, 125.79, 125.85, 128.07, 148.97, 150.30, 168.43;  $^{119}\text{Sn}$  NMR ( $\text{CDCl}_3$ )  $\delta$  -58.47, -44.84; HRMS Calcd for  $\text{C}_{13}\text{H}_{21}\text{Sn}_2$ :  $[\text{M-Me}]^-$ , 416.96817. Found:  $m/z$  416.96741.

**(Z)-(3-((Tetrahydro-2H-pyran-2-yl)oxy)prop-1-ene-1,2-diyl)bis(trimethylstannane)**  
**(3n)**

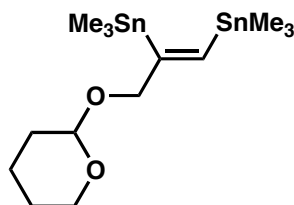

Isolated in 58% yield as a yellow green oil:  $^1\text{H}$  NMR ( $\text{CDCl}_3$ )  $\delta$  0.18 (s,  $^2J_{\text{Sn-H}} = 53.2$  Hz, 9H), 0.18 (s,  $^2J_{\text{Sn-H}} = 52.9$  Hz, 9H), 1.47–1.65 (m, 4H), 1.66–1.75 (m, 1H), 1.70 (tt,  $J = 13.1, 3.3$  Hz, 1H), 3.47–3.54 (m, 1H), 3.86 (ddd,  $J = 11.8, 8.7, 3.0$  Hz, 1H), 4.06 (dd,  $^3J_{\text{Sn-H}}^{119} = 34.2$  Hz,  $J = 12.1, 1.6$  Hz, 1H), 4.36 (dd,  $^3J_{\text{Sn-H}}^{119} = 39.6$  Hz,  $J = 12.0, 1.6$  Hz, 1H), 4.62 (t,  $J = 3.3$  Hz, 1H), 6.69 (t,  $^3J_{\text{Sn-H}}^{119} = 192.6$  Hz,  $^3J_{\text{Sn-H}}^{117} = 184.1$  Hz,  $^2J_{\text{Sn-H}}^{119} = 85.2$  Hz,  $^2J_{\text{Sn-H}}^{117} = 81.7$  Hz,  $J = 1.4$  Hz, 1H);  $^{13}\text{C}$  NMR ( $\text{CDCl}_3$ )  $\delta$  -7.65, 7.50, 19.29, 25.42, 25.45, 30.55, 61.93, 78.74, 97.81, 144.00, 164.75;  $^{119}\text{Sn}$  NMR ( $\text{CDCl}_3$ )  $\delta$  -59.66, -46.49; HRMS Calcd for  $\text{C}_{14}\text{H}_{30}\text{O}_2\text{NaSn}_2$ :  $[\text{M}+\text{Na}]^+$ , 493.01820. Found:  $m/z$  493.01810.

**(Z)-5,6-Bis(trimethylstannyl)hex-5-en-1-ol (3o)**

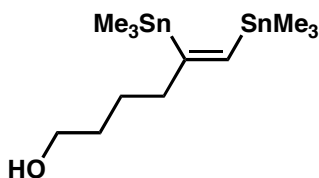

Isolated in 13% yield as a colorless oil:  $^1\text{H}$  NMR ( $\text{CDCl}_3$ )  $\delta$  0.15 (s,  $^2J_{\text{Sn-H}} = 52.8$  Hz, 9H), 0.17 (s,  $^2J_{\text{Sn-H}} = 51.5$  Hz, 9H), 1.22 (t,  $J = 4.2$  Hz, 1H), 1.41 (quint,  $J = 7.3$  Hz, 2H), 1.55 (quint,  $J = 7.3$  Hz, 2H), 2.35 (t,  $^3J_{\text{Sn-H}} = 50.1$ ,  $J = 7.6$  Hz, 2H), 3.64 (q,  $J = 5.4$  Hz, 2H), 6.62 (s,  $^3J_{\text{Sn-H}}^{119} = 199.8$  Hz,  $^3J_{\text{Sn-H}}^{117} = 193.7$  Hz,  $^2J_{\text{Sn-H}}^{119} = 86.6$  Hz, 1H);  $^{13}\text{C}$  NMR ( $\text{CDCl}_3$ )  $\delta$  -7.72, -7.49, 25.82, 32.23, 47.21, 62.84, 143.22, 168.51;  $^{119}\text{Sn}$  NMR ( $\text{CDCl}_3$ )  $\delta$  -63.09, -50.40; HRMS Calcd for  $\text{C}_{11}\text{H}_{25}\text{OSn}_2$ :  $[\text{M-Me}]^-$ , 412.99439. Found:  $m/z$  412.99545.

**(1Z,7Z)-Octa-1,7-diene-1,2,7,8-tetrayltetrakis(trimethylstannane) (3p)**

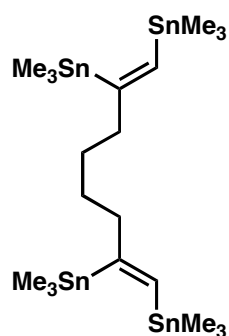

Isolated in 66% yield as a colorless oil:  $^1\text{H}$  NMR ( $\text{CDCl}_3$ )  $\delta$  0.15 (s,  $^2J_{^{119}\text{Sn-H}} = 54.1$  Hz,  $^2J_{^{117}\text{Sn-H}} = 51.7$  Hz, 18H), 0.16 (s,  $^2J_{^{119}\text{Sn-H}} = 52.7$  Hz,  $^2J_{^{117}\text{Sn-H}} = 50.3$  Hz, 18H), 1.33 (quint,  $J = 3.5$  Hz, 4H), 2.33 (t,  $^3J_{\text{Sn-H}} = 50.7$  Hz,  $J = 6.2$  Hz, 4H), 6.60 (s,  $^3J_{^{119}\text{Sn-H}} = 202.2$  Hz,  $^3J_{^{117}\text{Sn-H}} = 193.3$  Hz,  $^2J_{^{119}\text{Sn-H}} = 89.7$  Hz,  $^2J_{^{117}\text{Sn-H}} = 86.2$  Hz, 2H);  $^{13}\text{C}$  NMR ( $\text{CDCl}_3$ )  $\delta$  -7.68, -7.41, 29.45, 47.44, 142.84, 168.91;  $^{119}\text{Sn}$  NMR ( $\text{CDCl}_3$ )  $\delta$  -63.33, -50.65; HRMS Calcd for  $\text{C}_{19}\text{H}_{43}\text{Sn}_4$ :  $[\text{M-Me}]^-$ , 750.94472. Found:  $m/z$  750.94637.



## References

- 1 G. F. Smith, H. G. Kuivila, R. Simon and L. Sultan, *J. Am. Chem. Soc.*, 1981, **103**, 833.
- 2 B. Hammond, F. H. Jardine and A. G. Vohra, *J. Inorg. Nucl. Chem.*, 1971, **33**, 1017.

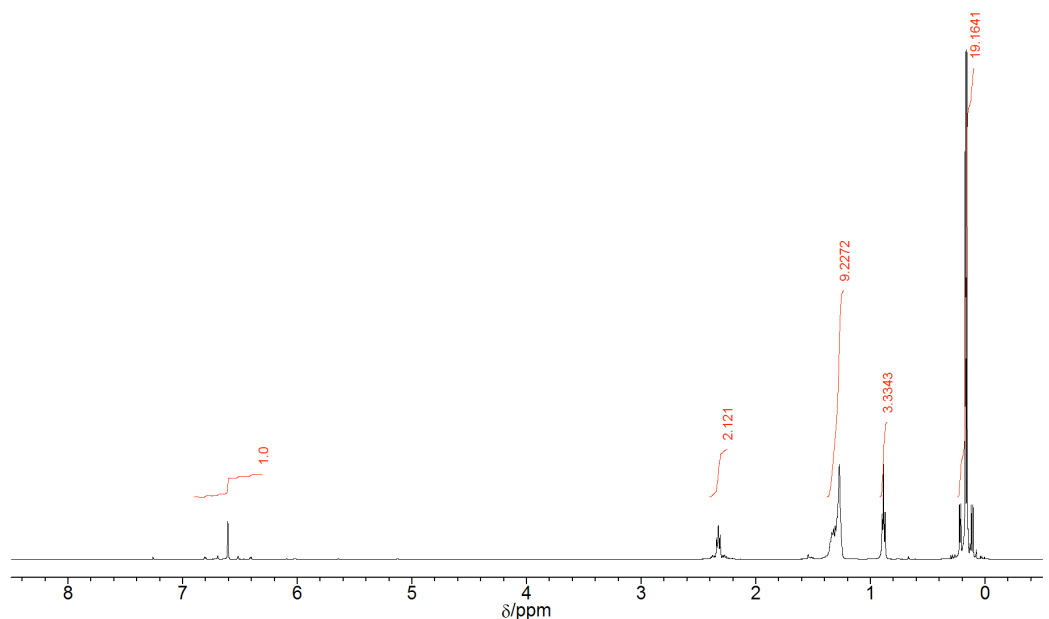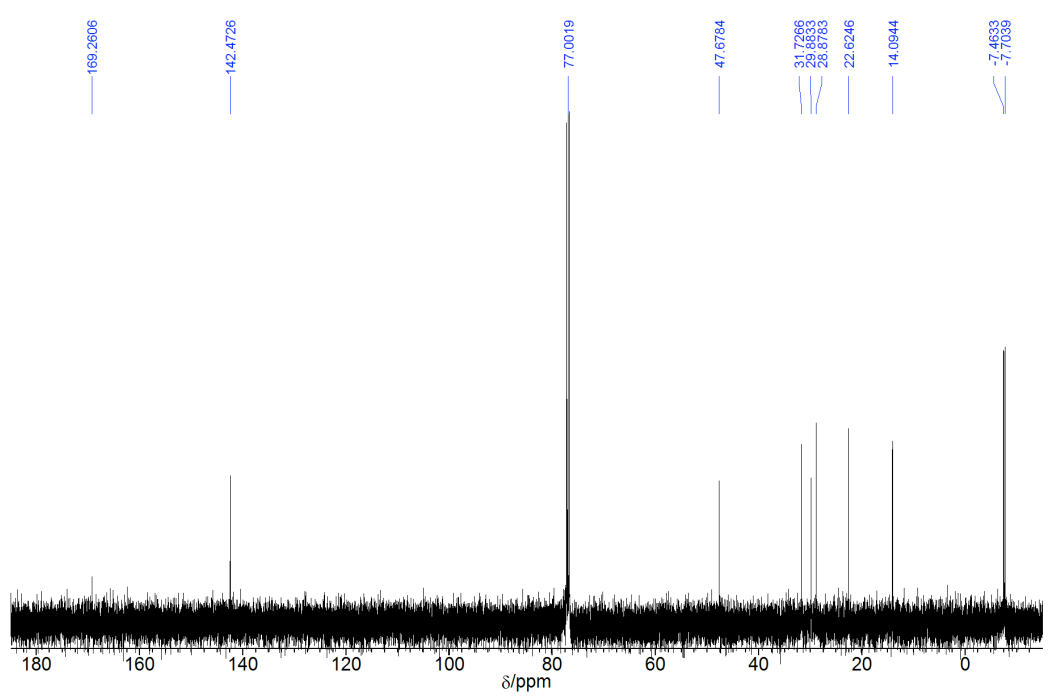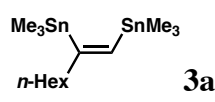

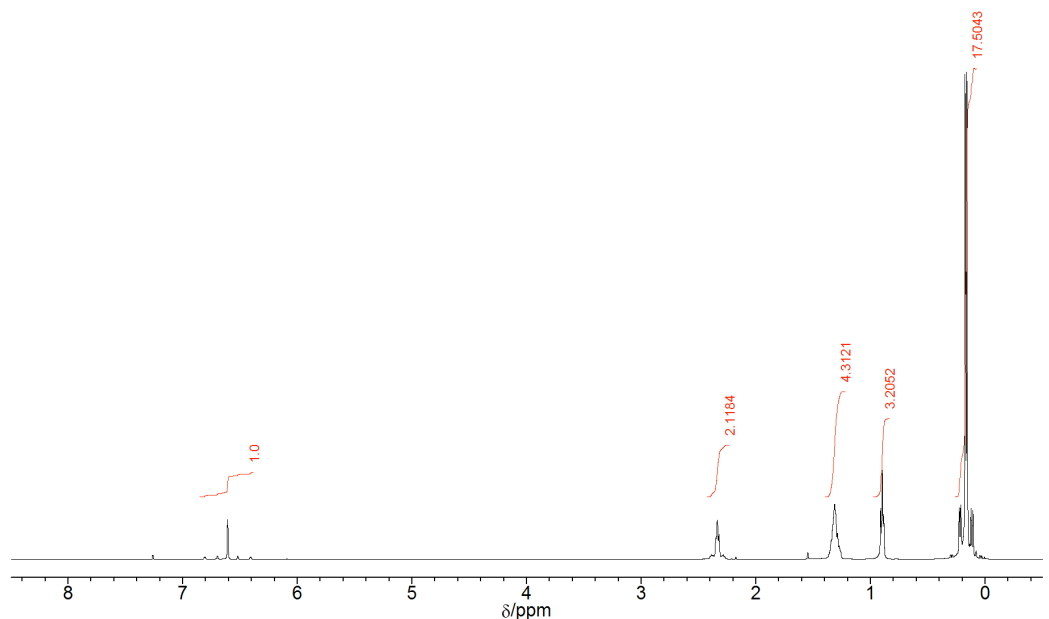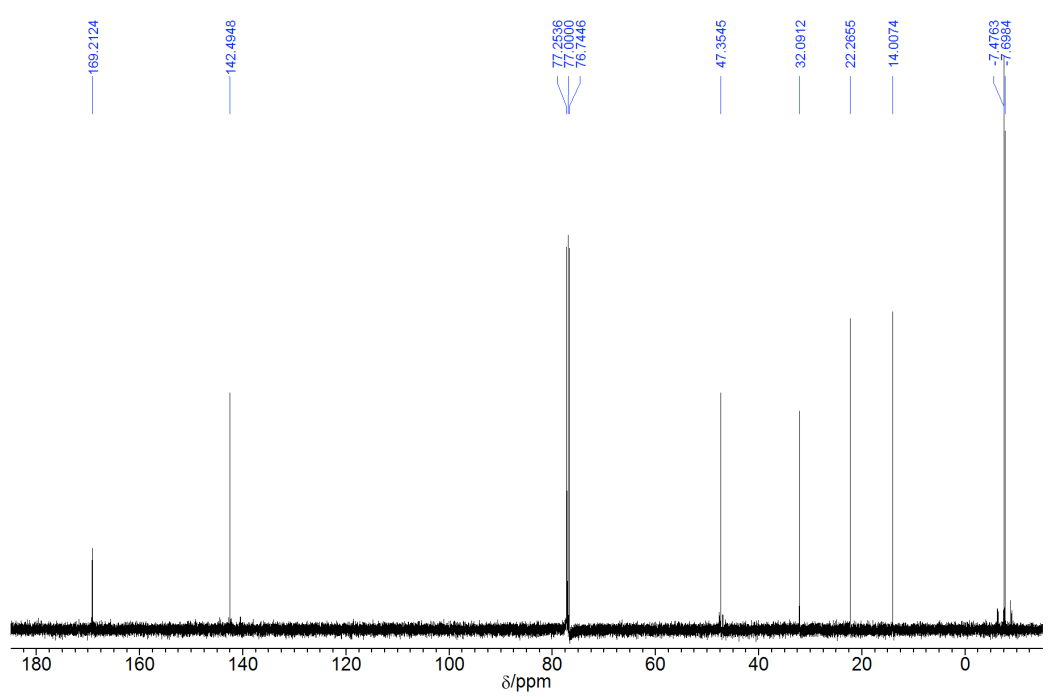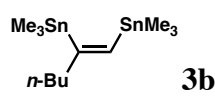

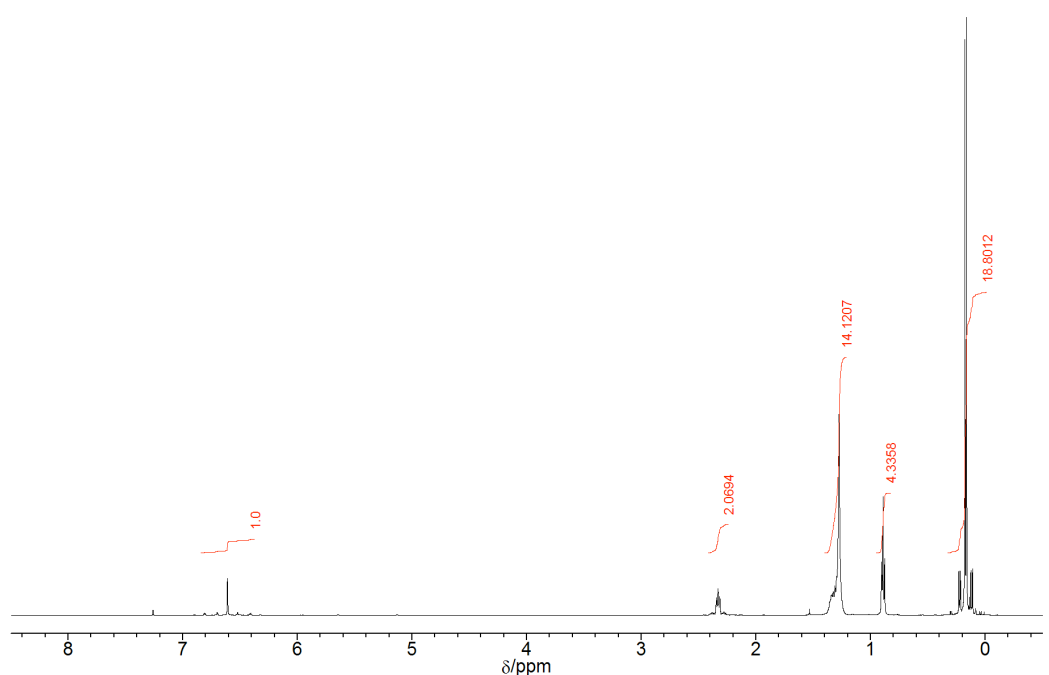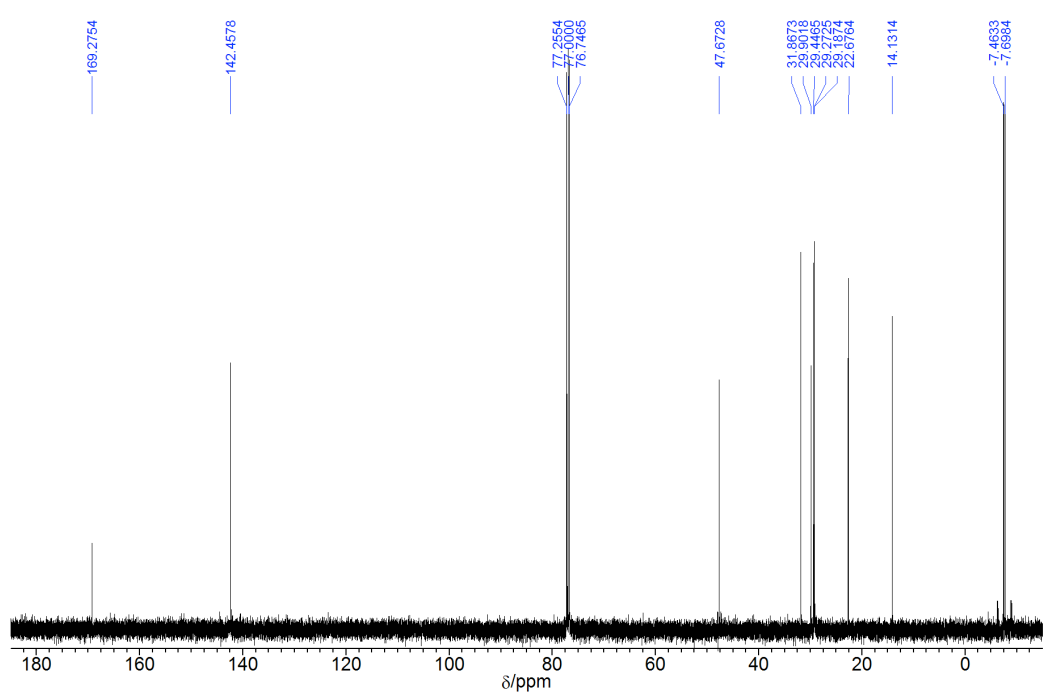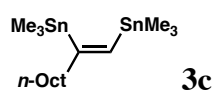

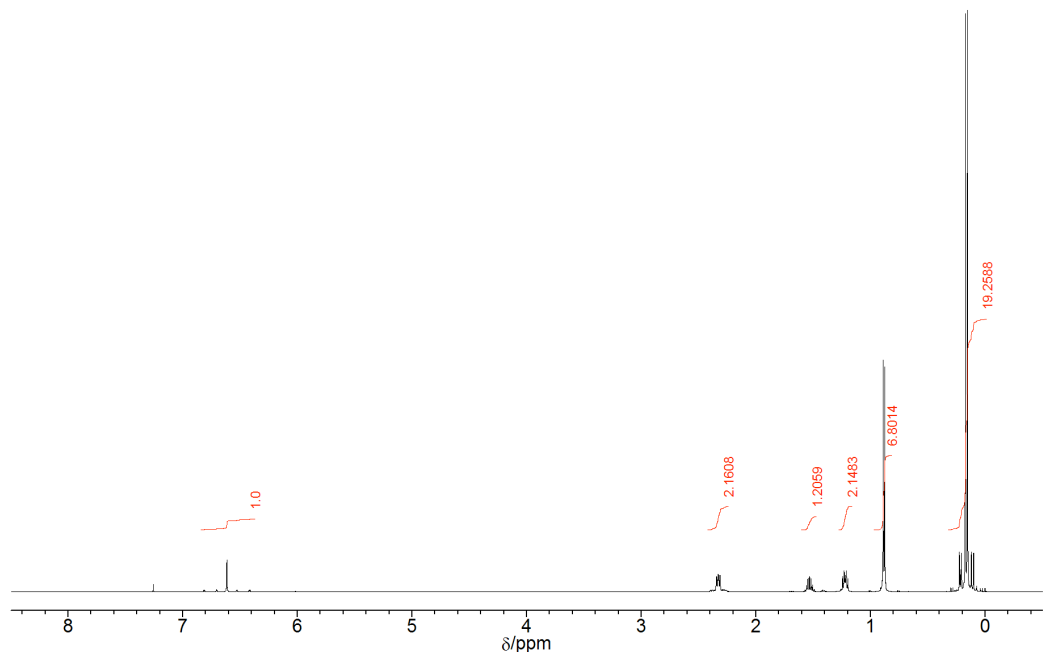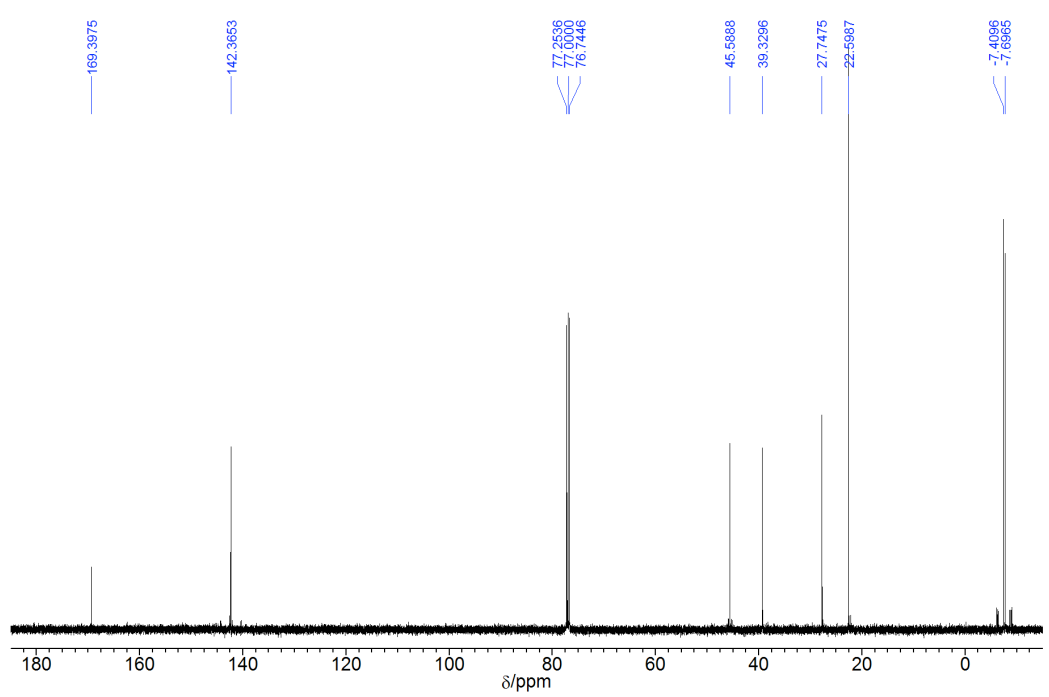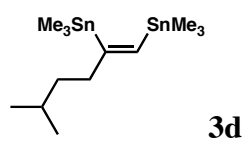

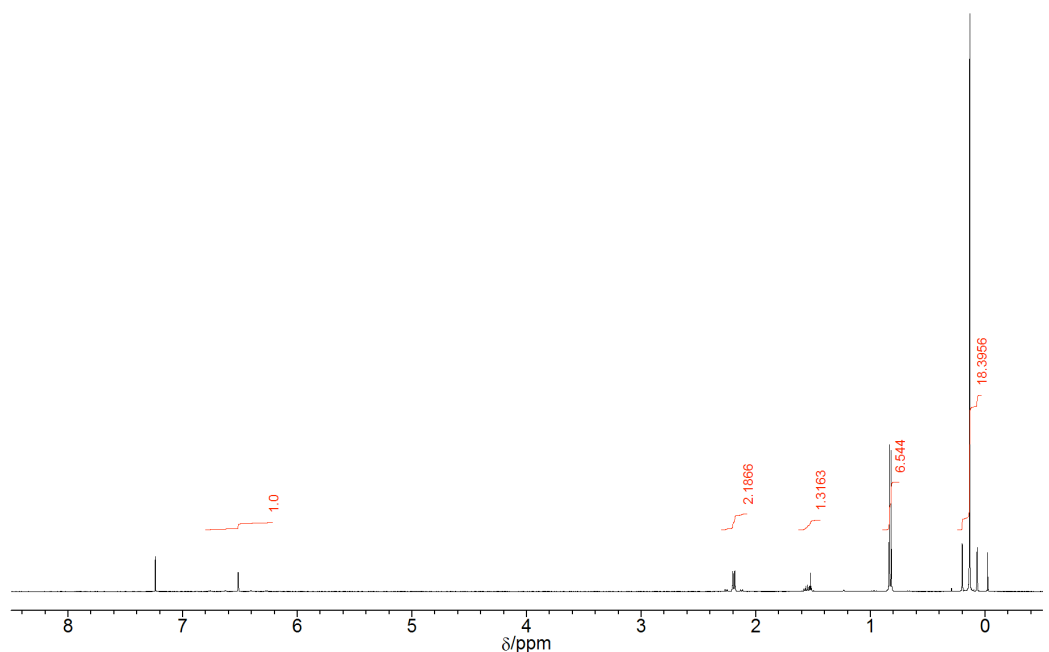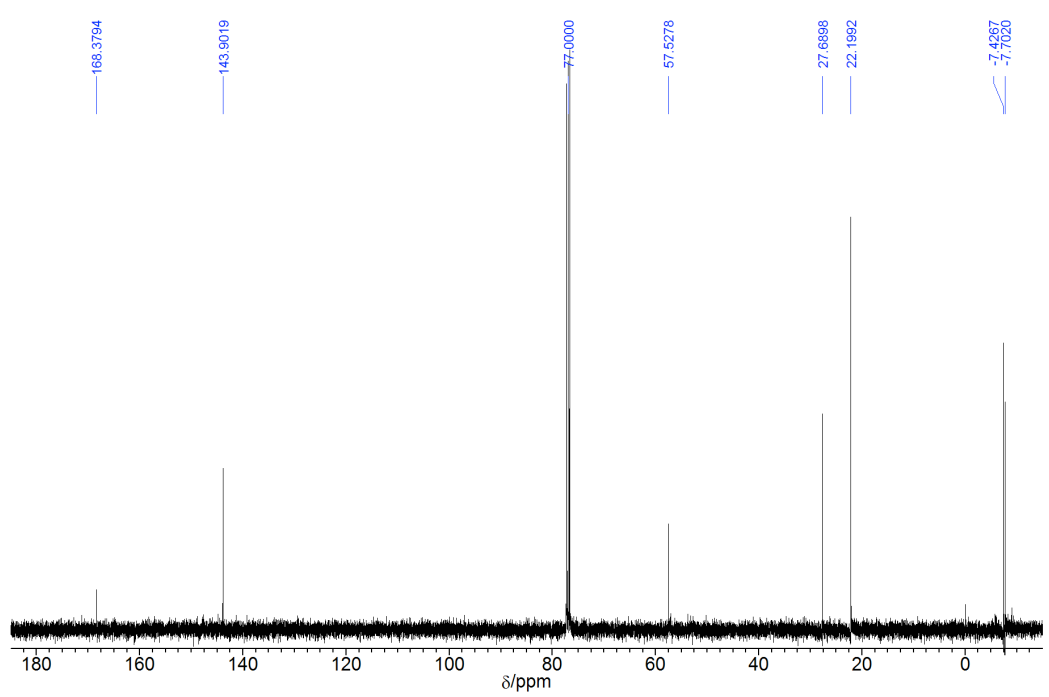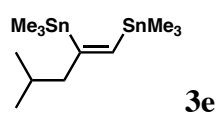

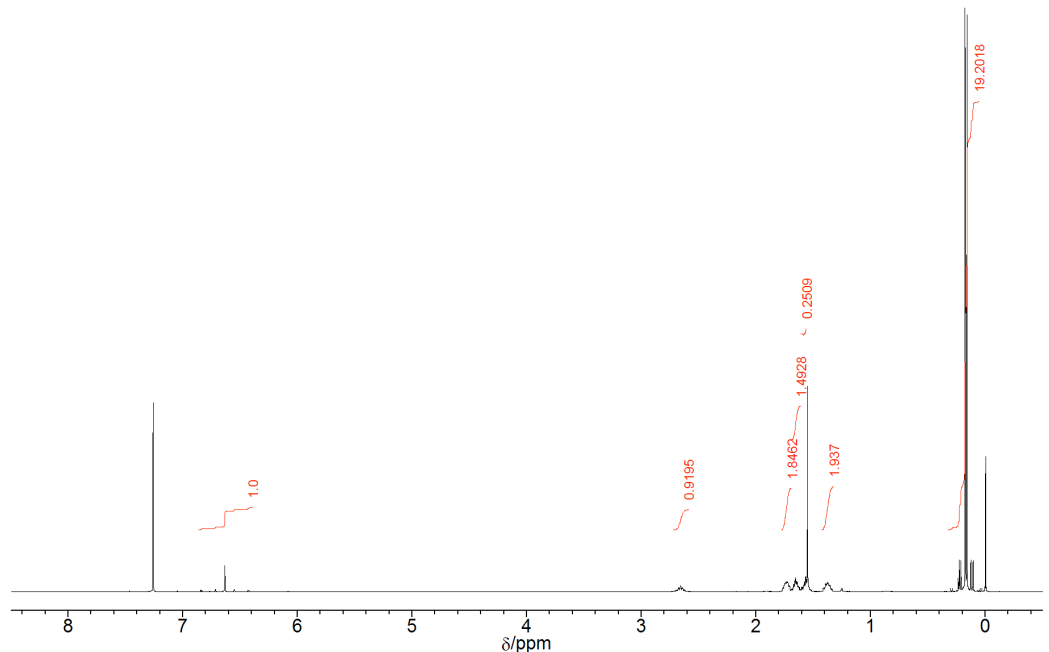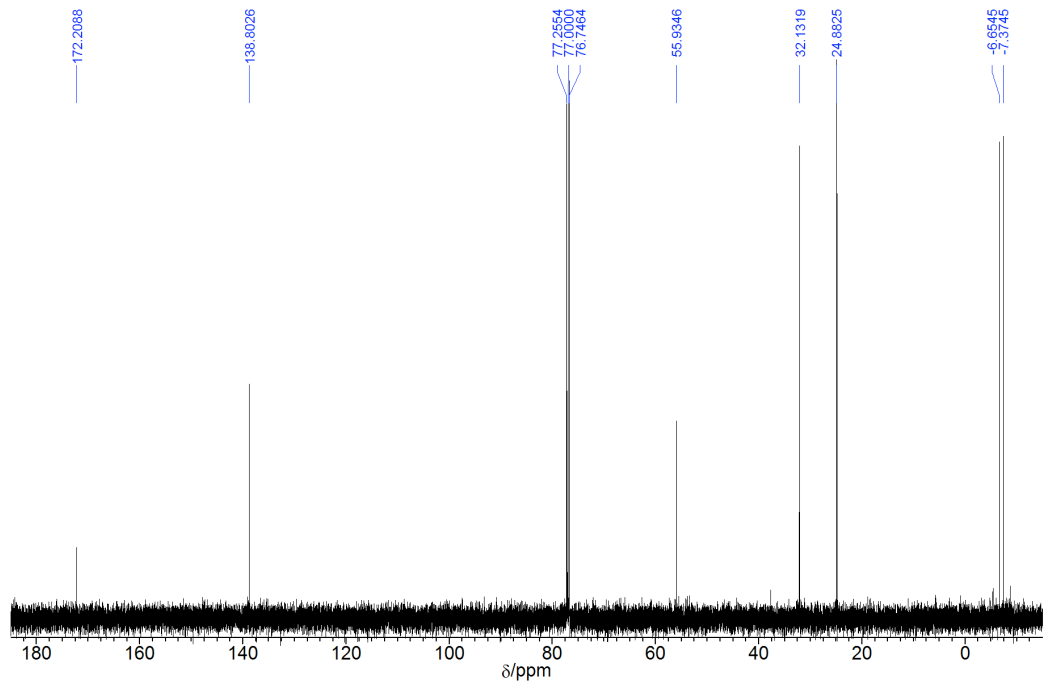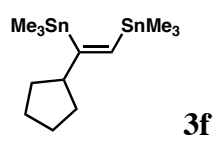

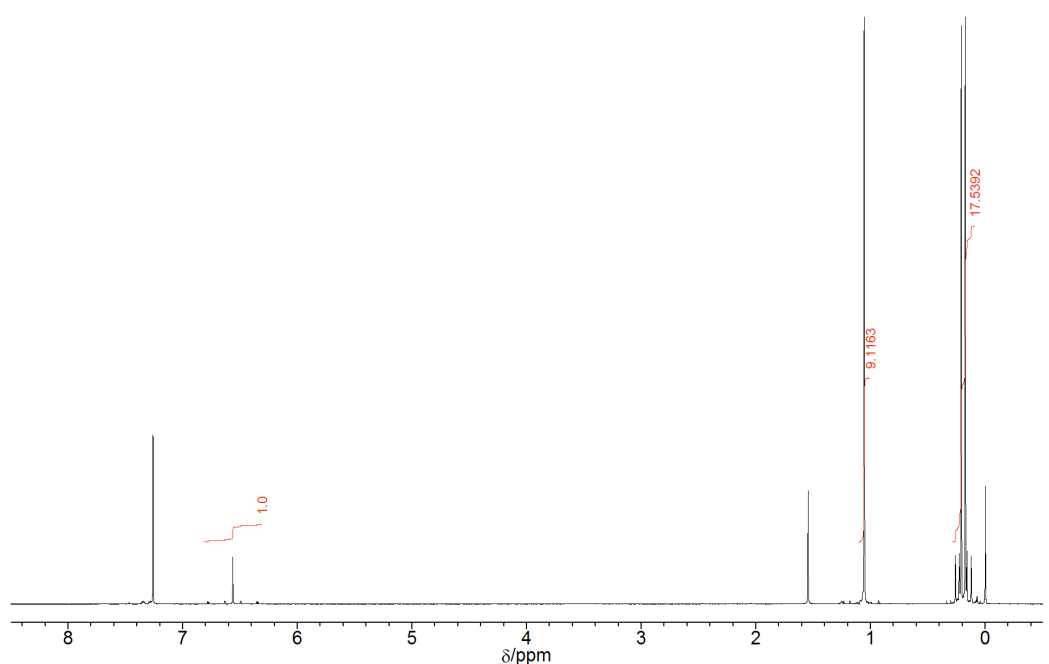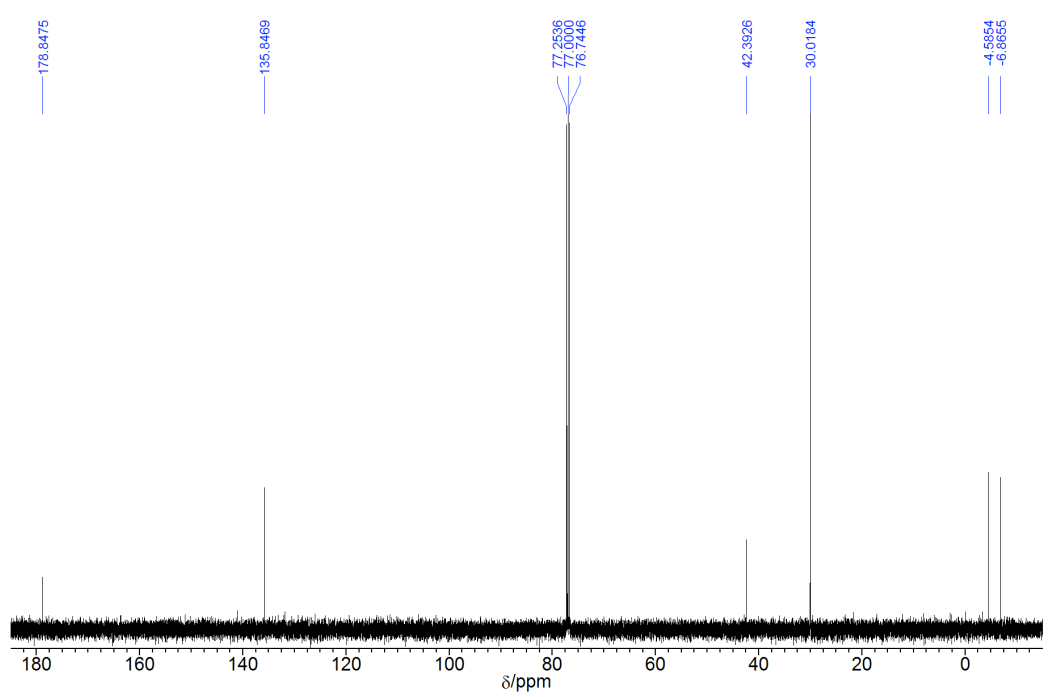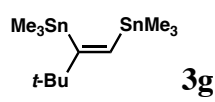



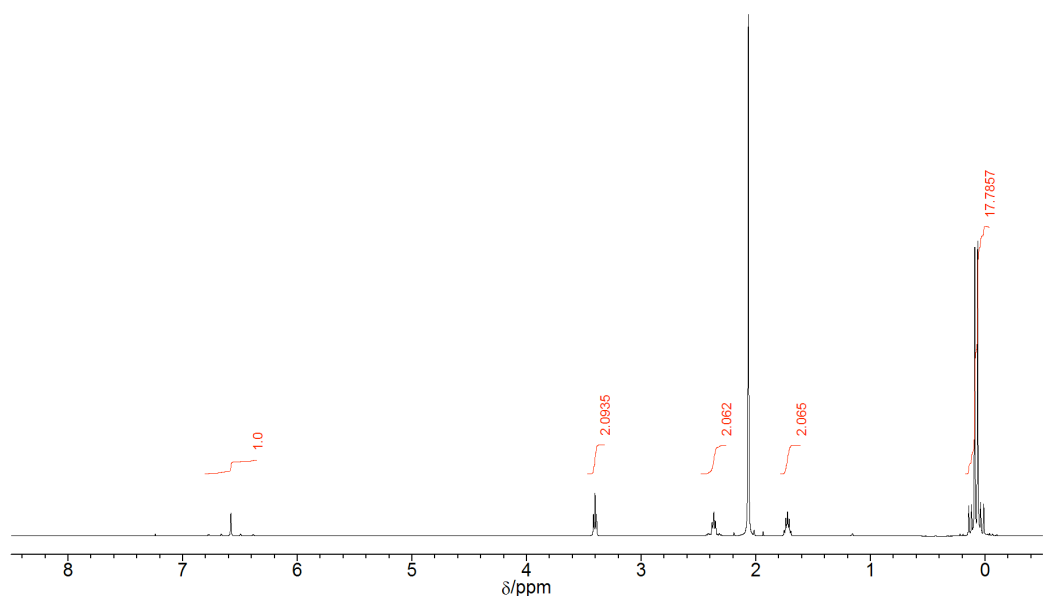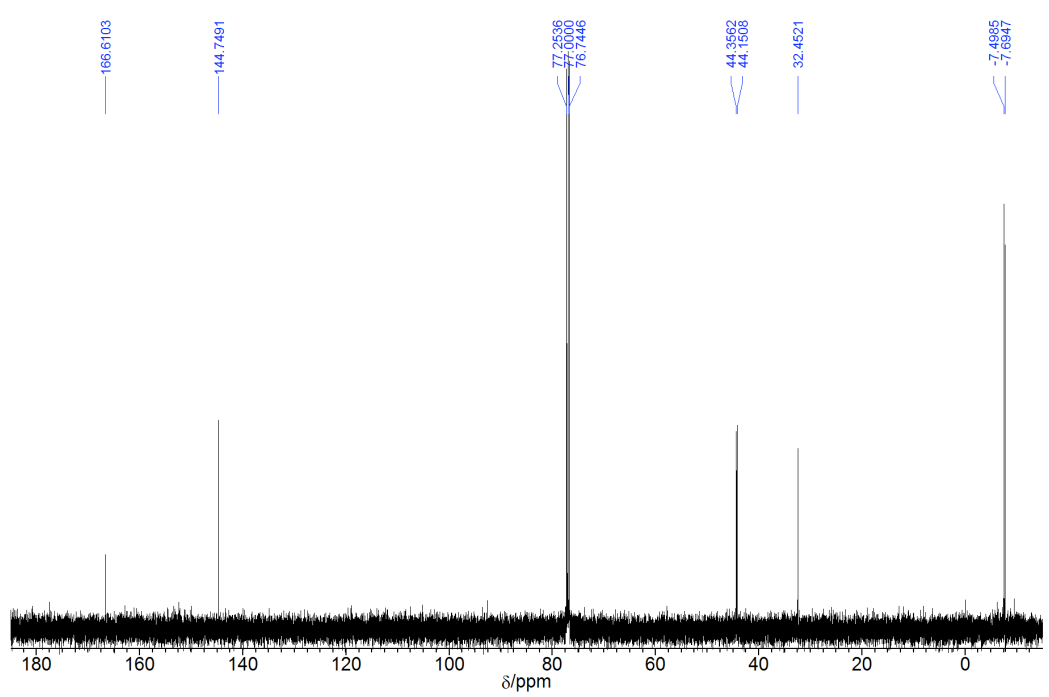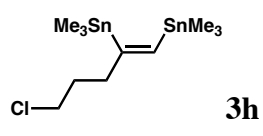

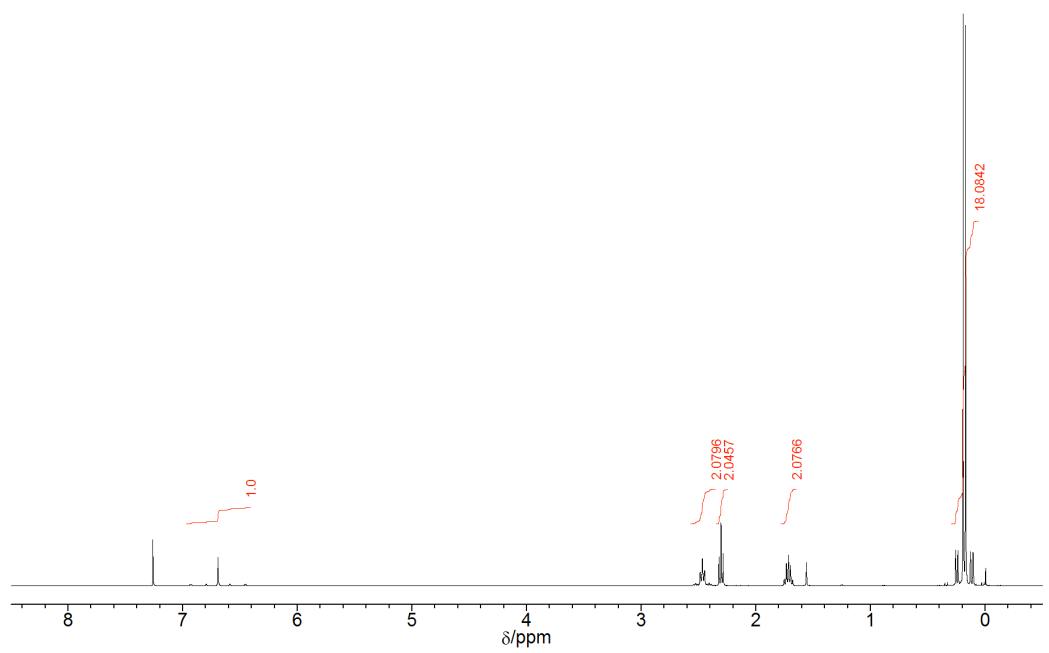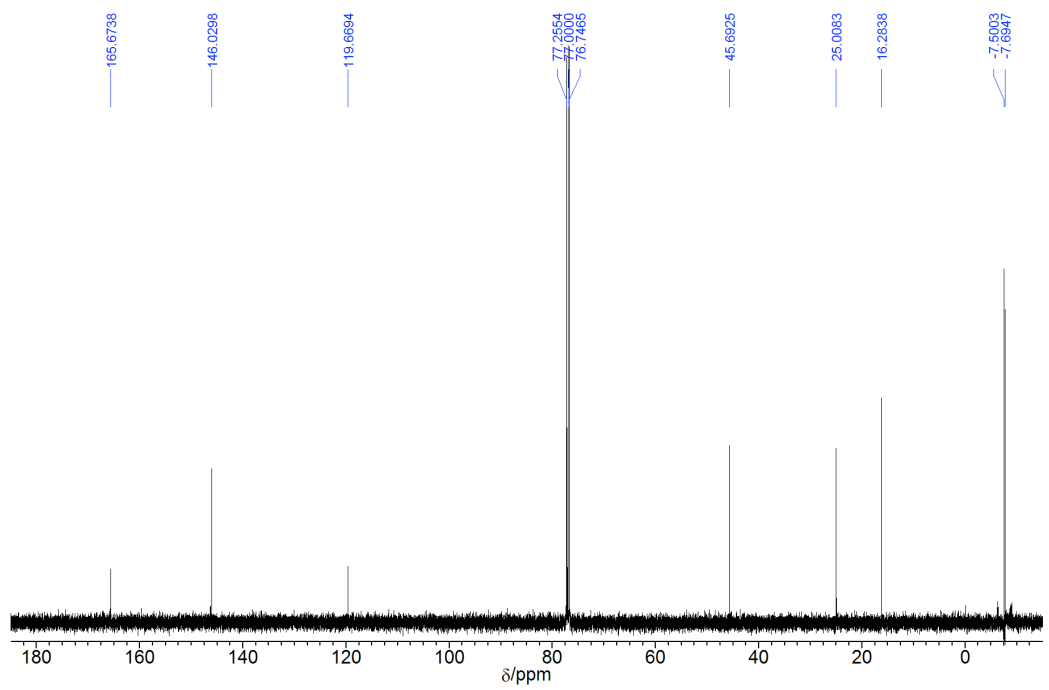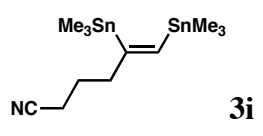

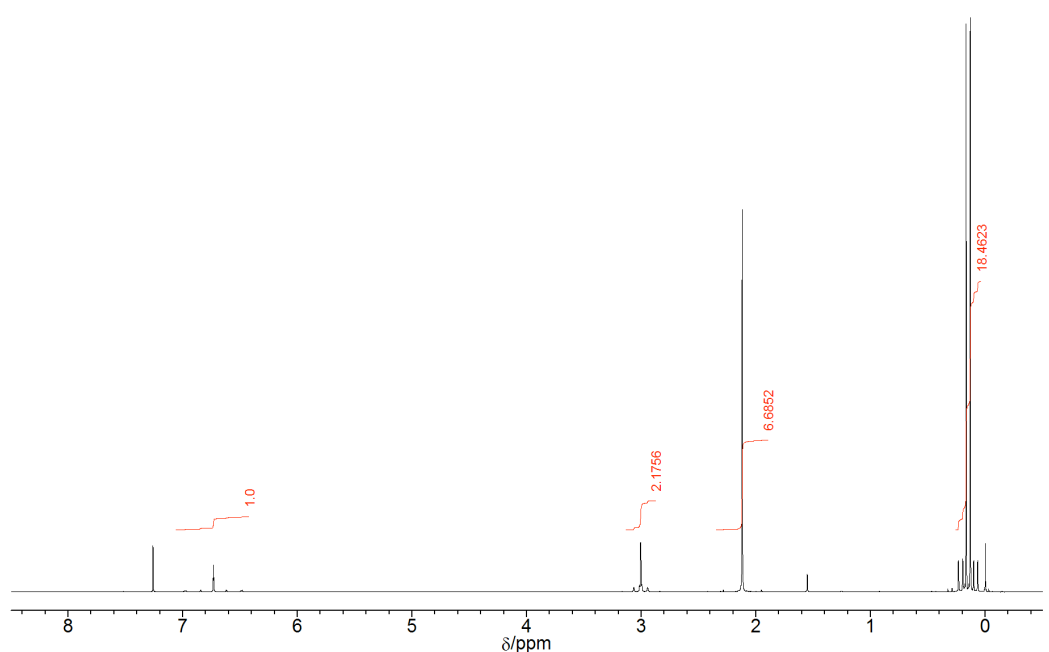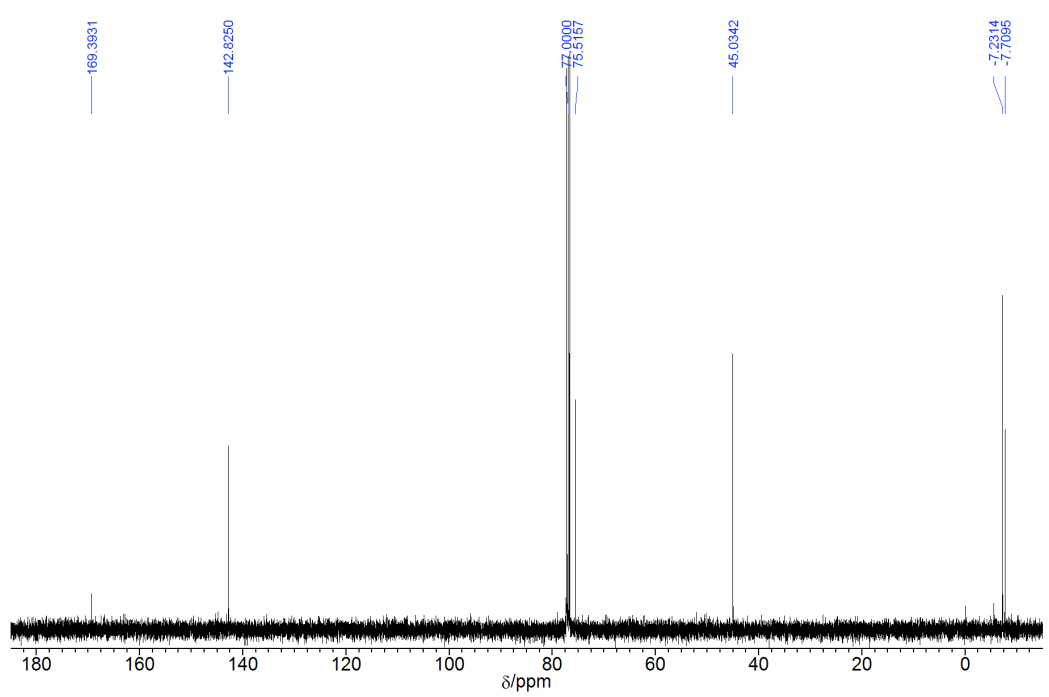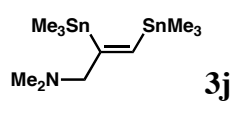

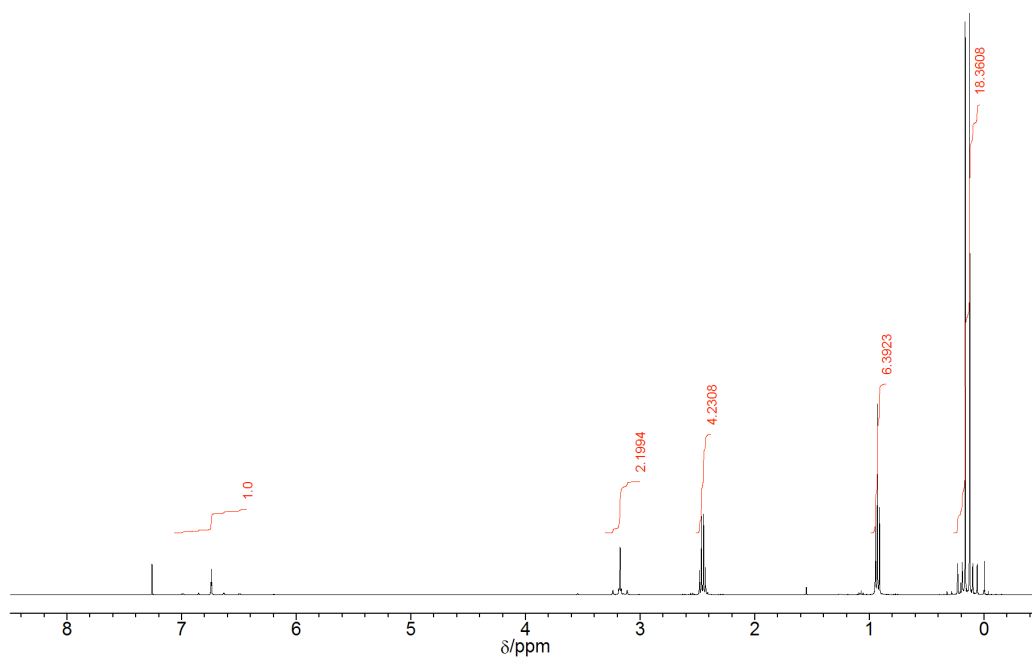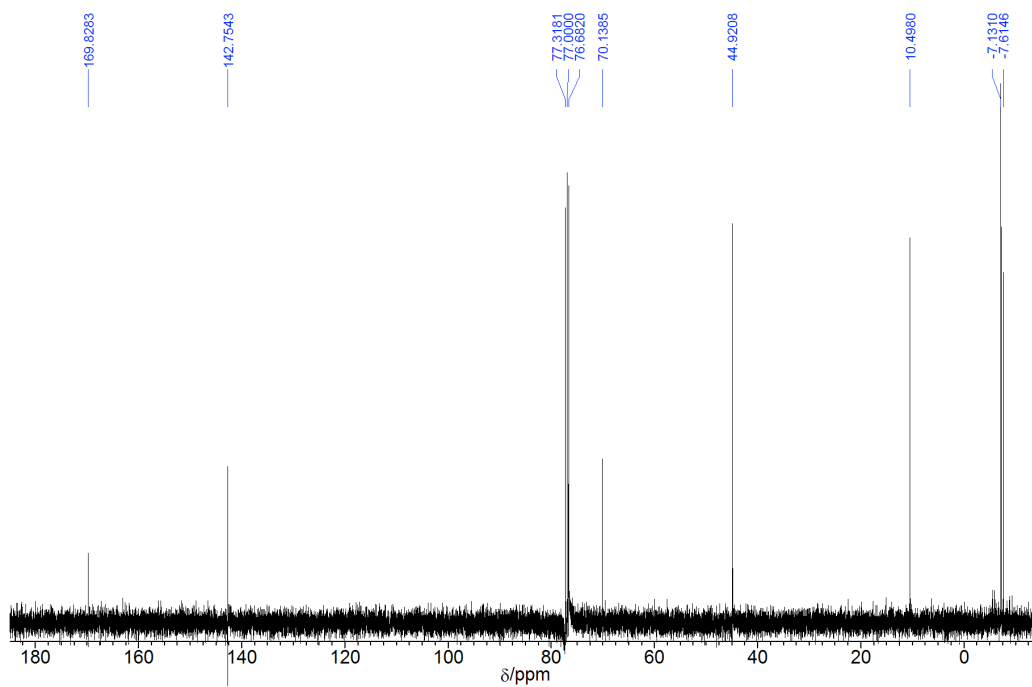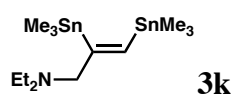

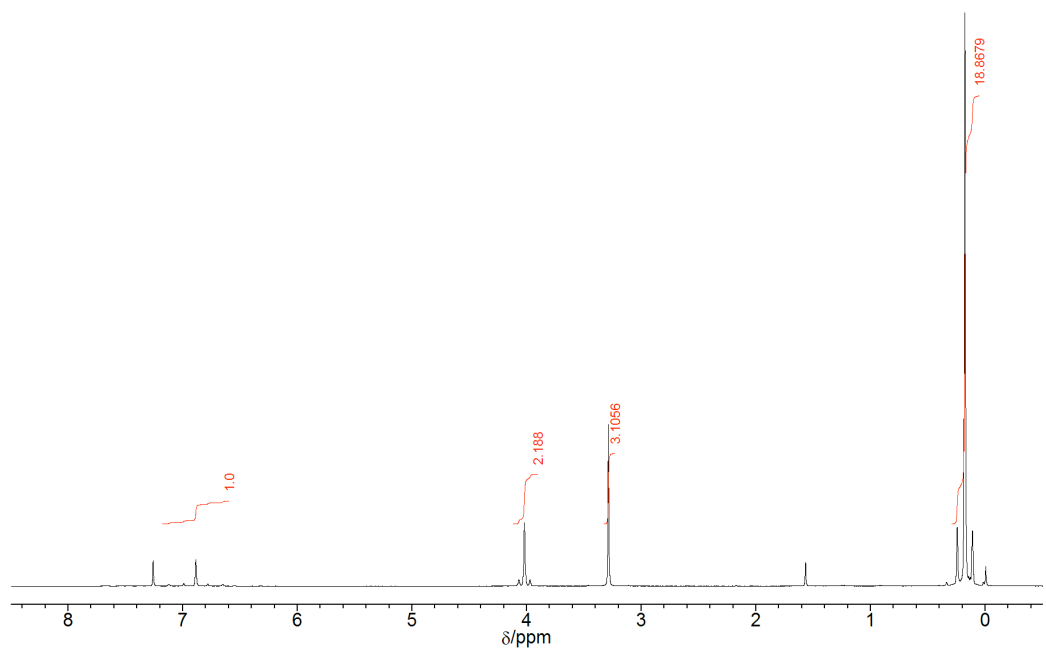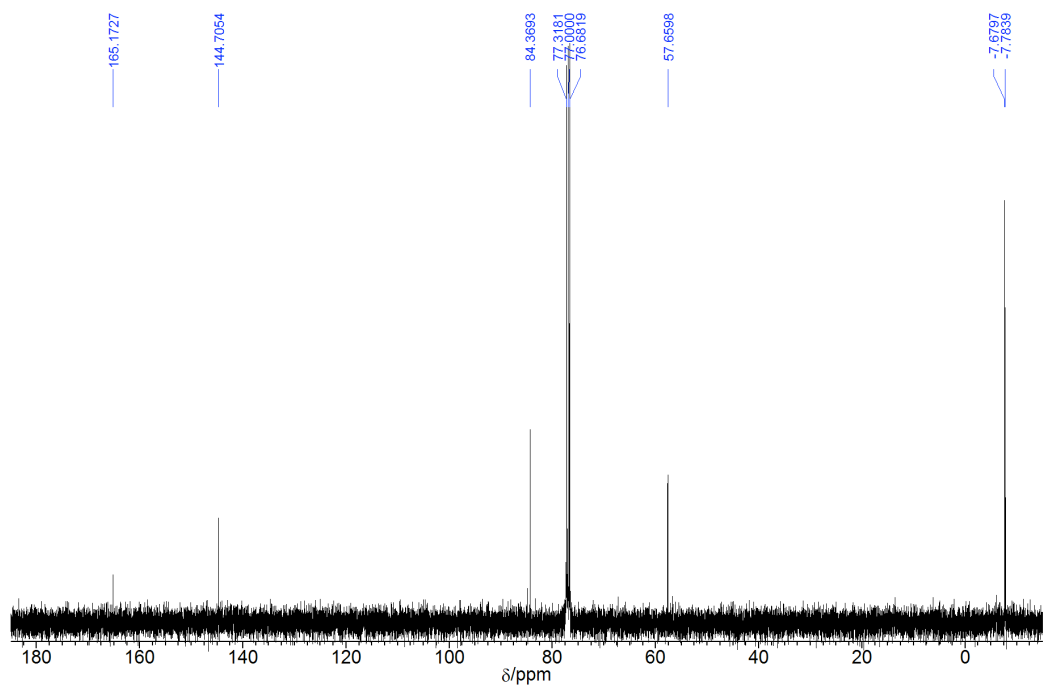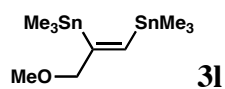

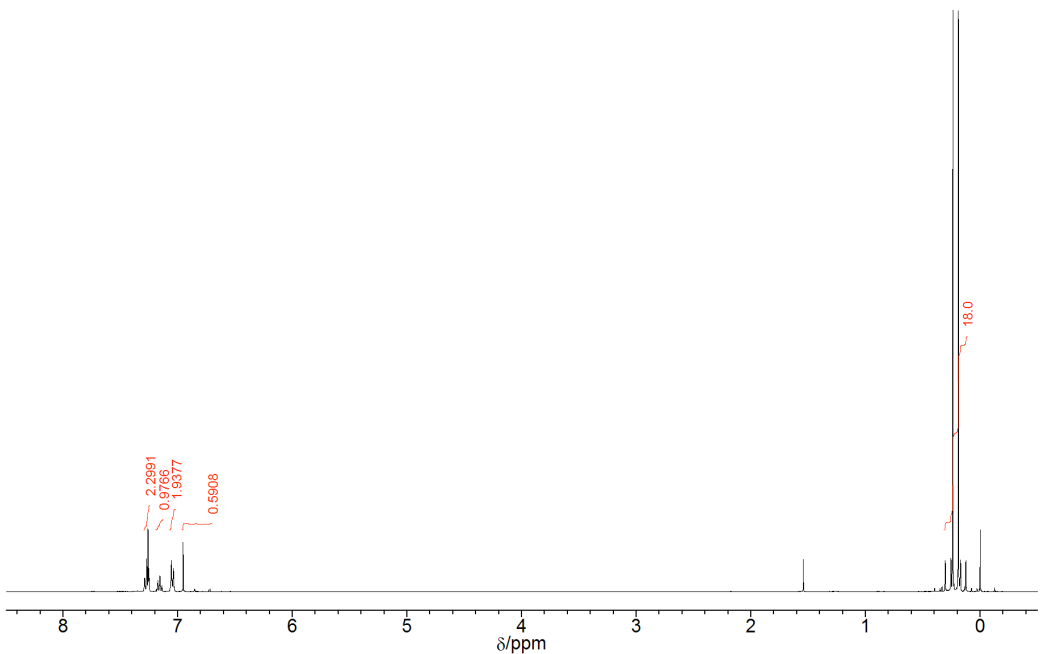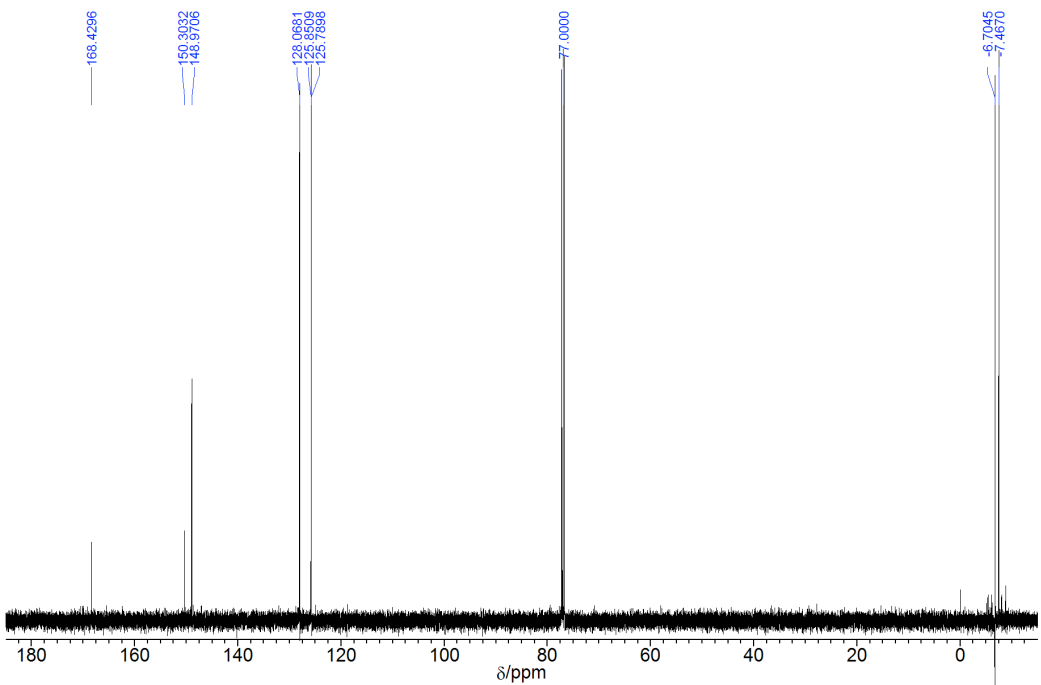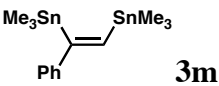

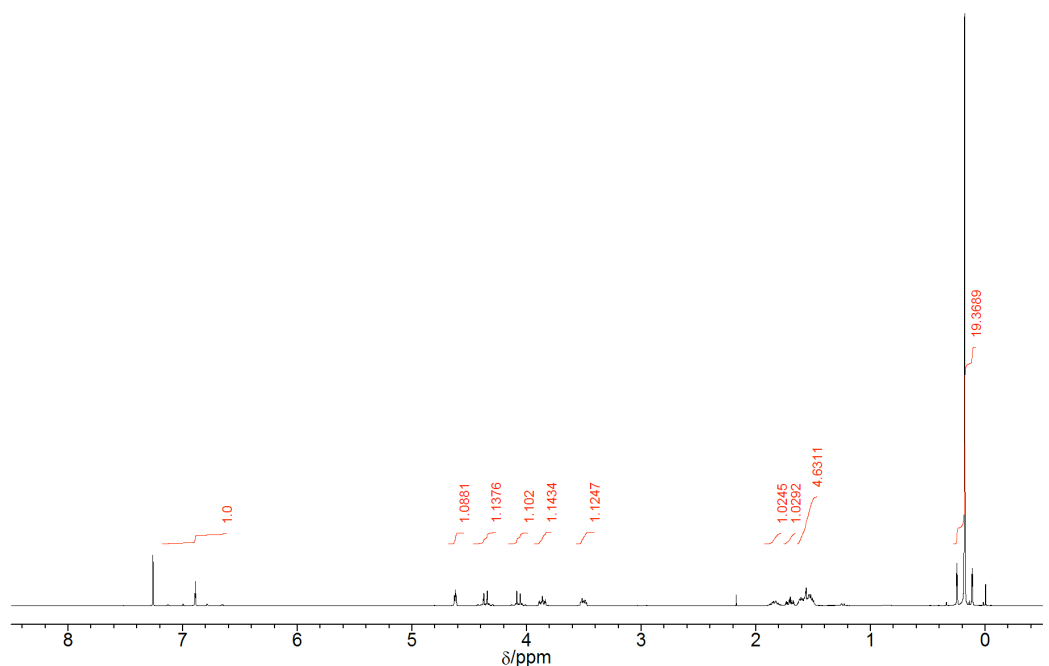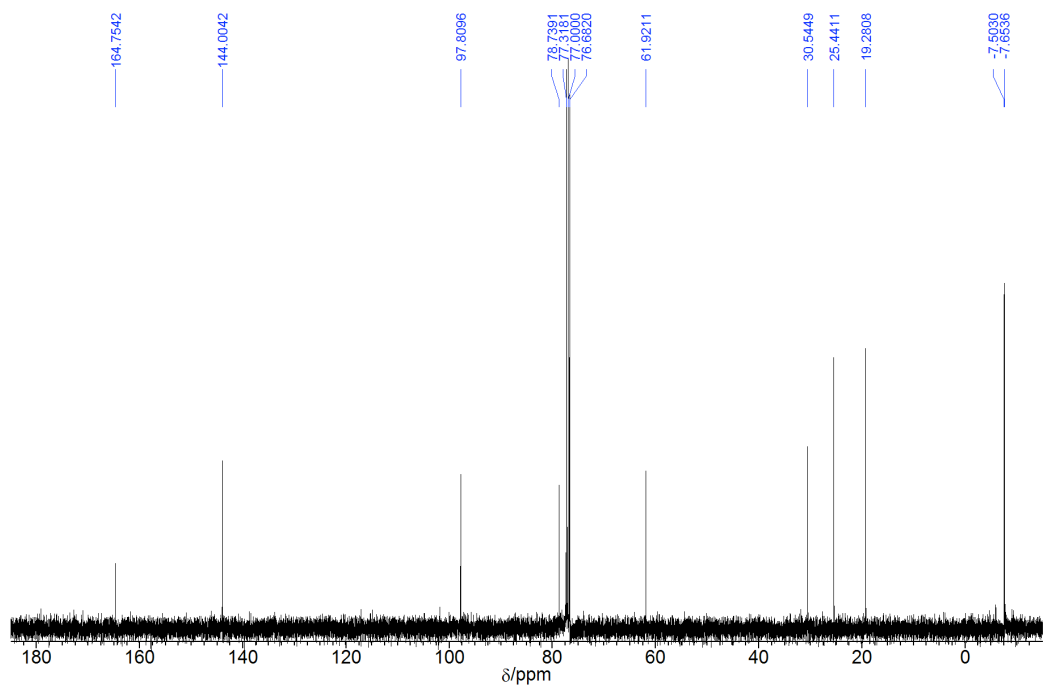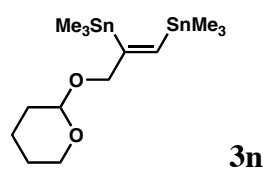

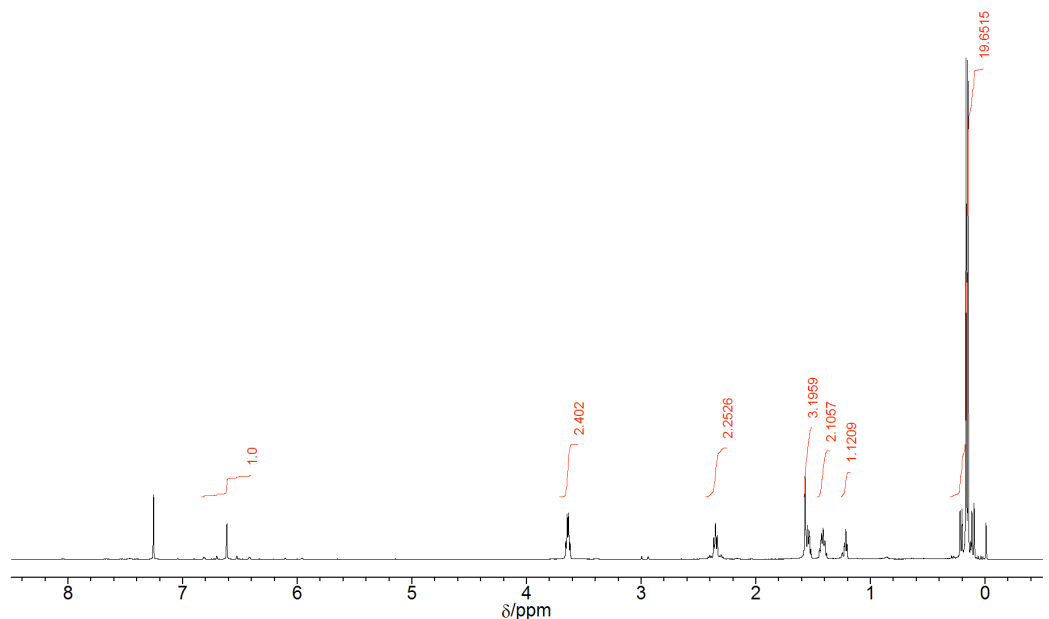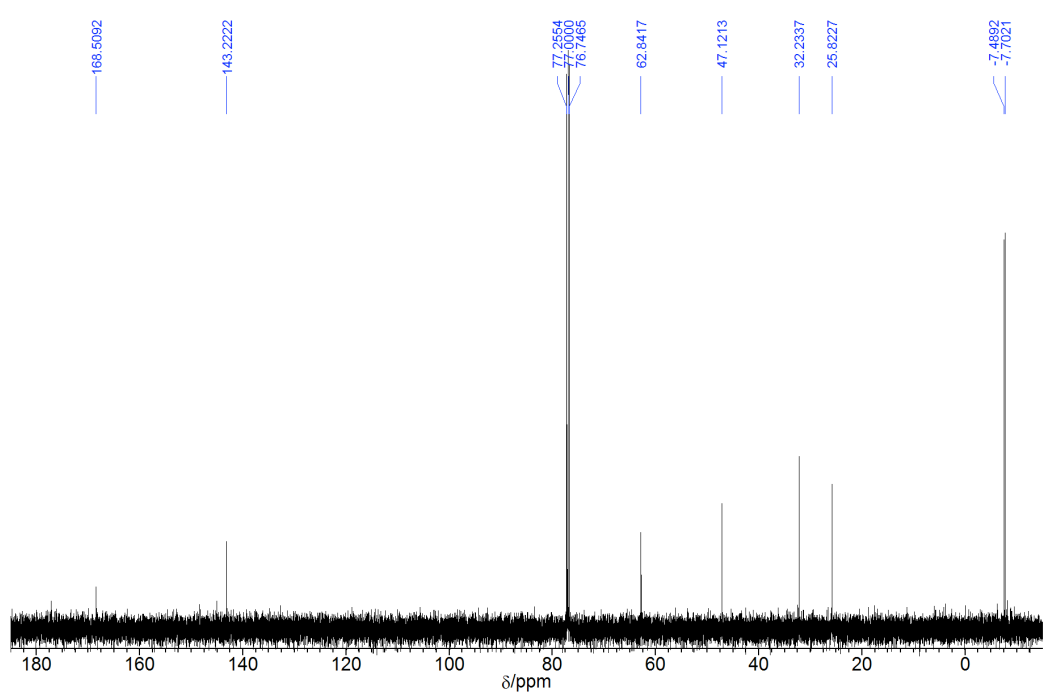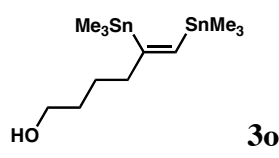



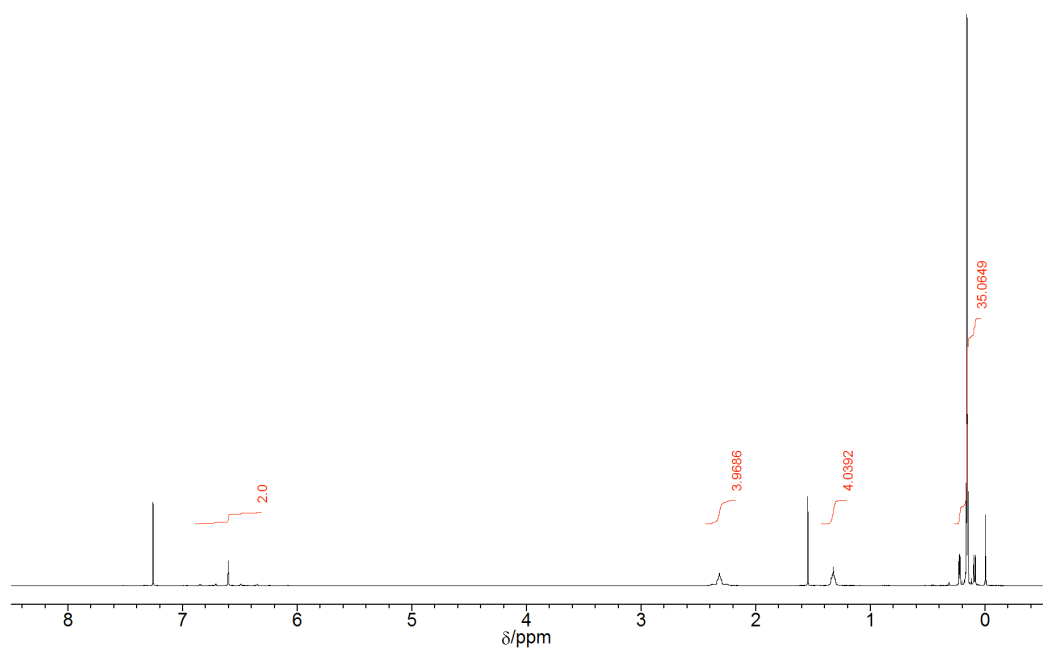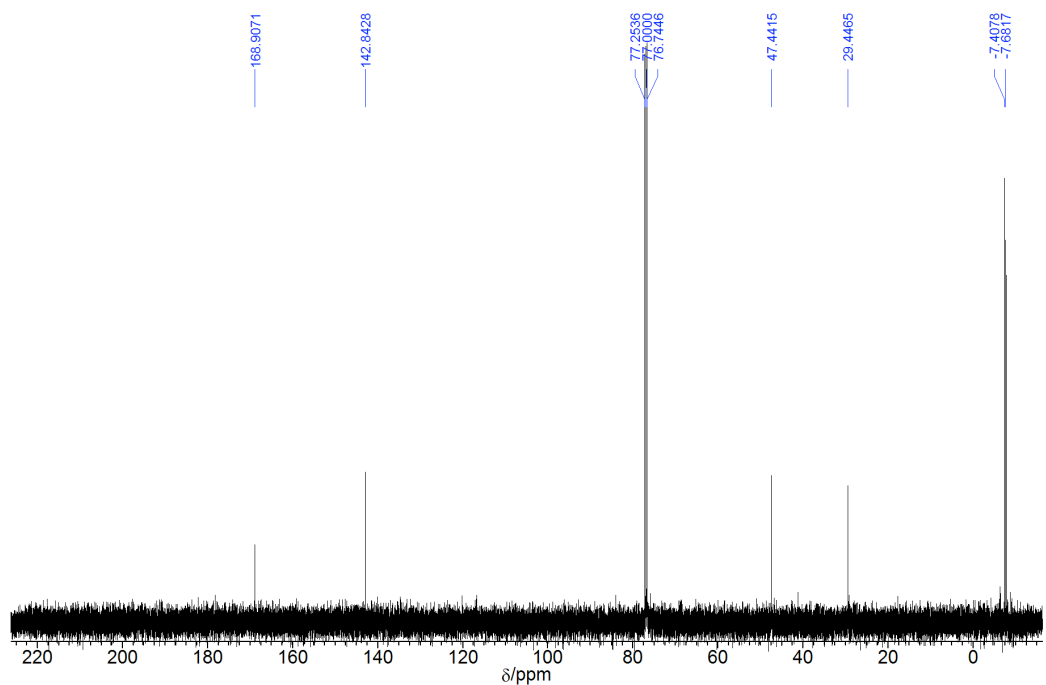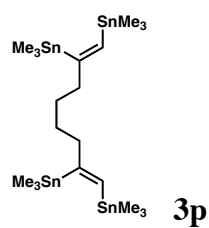

Supplement: c3cc47173j.pdf [file c3cc47173j.pdf]
